# Supplementary material for: Fluorescent “on–off–on” sensor based on N,S co-doped carbon dots from seaweed (Sargassum carpophyllum) for specific detection of Cr(vi) and ascorbic acid
Source: Royal Society of Chemistry journal article supplement (doi:10.1039/d1ra06544k), 2021-01-01
Supplement: d1ra06544k1.pdf [file d1ra06544k1.pdf]

## Supplementary Material

### Fluorescent “on-off-on” sensor based on N, S co-doped carbon dots from seaweed (*Sargassum carpophyllum*) for specific detection of Cr(VI) and ascorbic acid

Hua Tian<sup>1 †</sup>, · Guangxu Ju<sup>1 †</sup>, · Mengting Li<sup>1</sup>, · Wenzhe Fu<sup>1</sup>, · Yongcheng Dai<sup>1</sup>, ·  
Zhenyi Liang<sup>1</sup>, · Yuheng Qiu<sup>1</sup> · Ziyu Qin<sup>1 \*</sup>, · Xueqiong Yin<sup>1 \*</sup>

<sup>1</sup> Hainan Provincial Fine Chemical Engineering Research Center, Hainan University, Haikou,  
Hainan, 570228, P.R. China

<sup>†</sup>Authors contributed equally to the work.

<sup>\*</sup>Corresponding author.

Xueqiong Yin

Address: School of Chemical Engineering and Technology, Hainan University, 58<sup>th</sup>  
Renmin Road, Haikou, Hainan, 570228, PR China. *E-mail address:*  
yxq88@hotmail.com (X. Q. Yin). Tel.: +86 898 66279161. Fax: +86 898 66291383.  
Mobile: +86 13138907588.

Ziyu Qin

Address: School of Chemical Engineering and Technology, Hainan University, 58<sup>th</sup>  
Renmin Road, Haikou, Hainan, 570228, PR China. *E-mail address:*  
ziyuqin@hainanu.edu.cn.

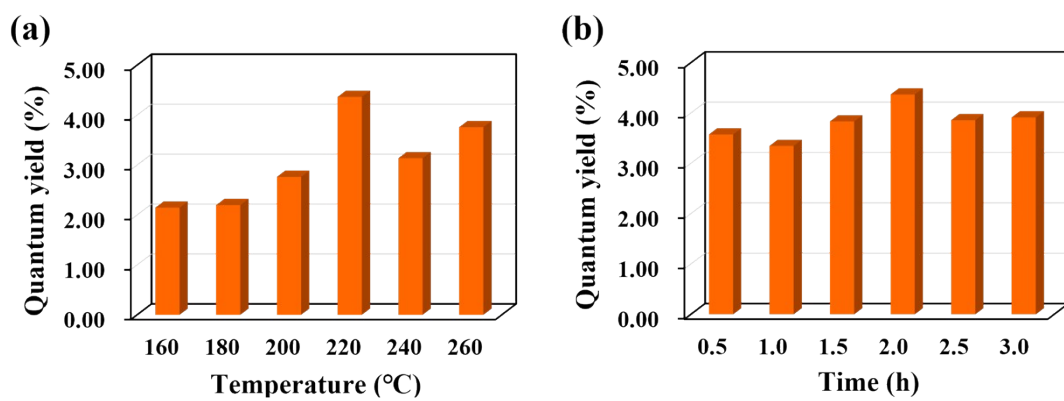

Fig. S1 (a) The effect of temperature on the QY. (b) The effect of time on the QY.

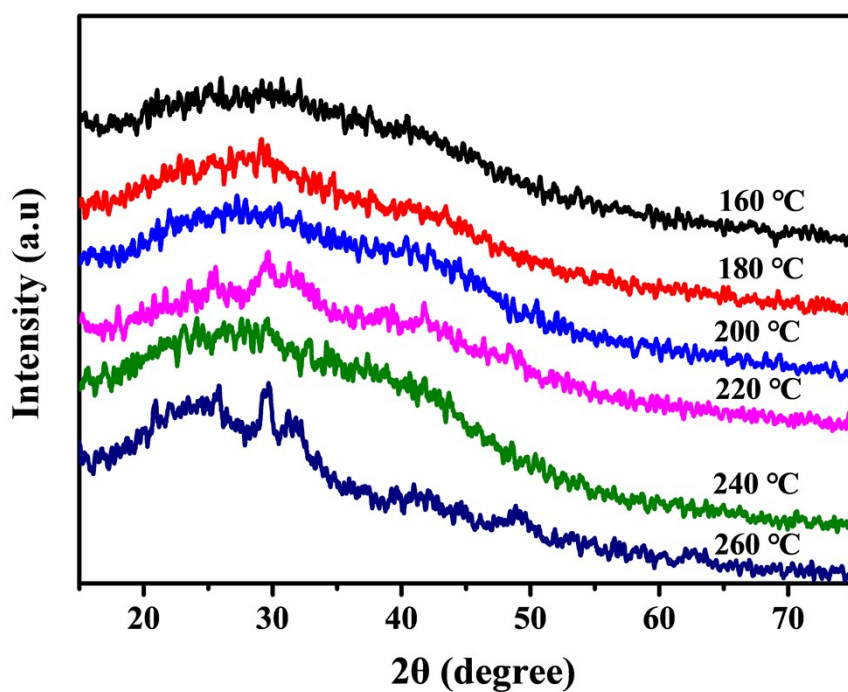

Fig. S2 XRD patterns of N,S-CDs at different temperature.

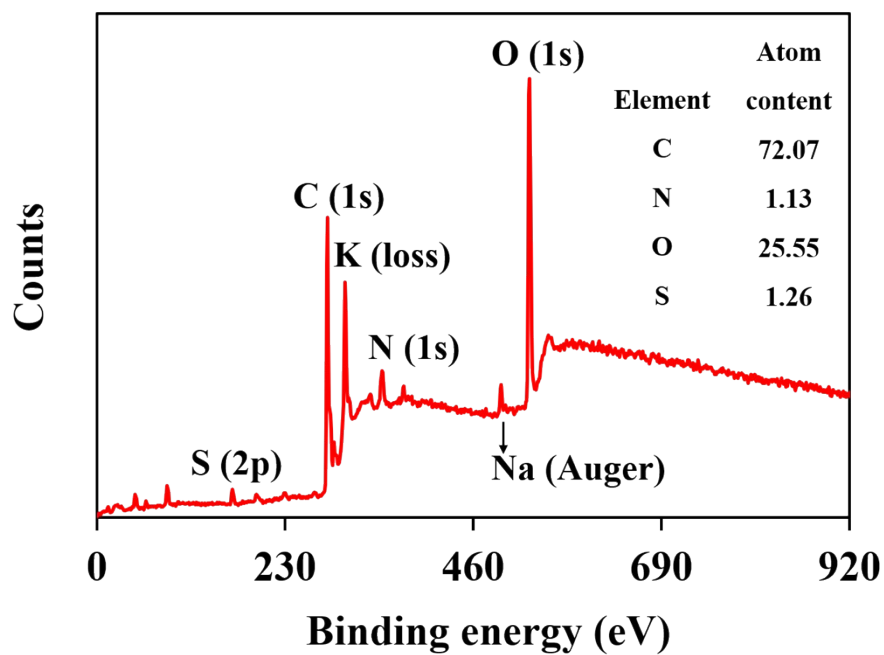

Fig. S3 XPS survey spectrum of N,S-CDs

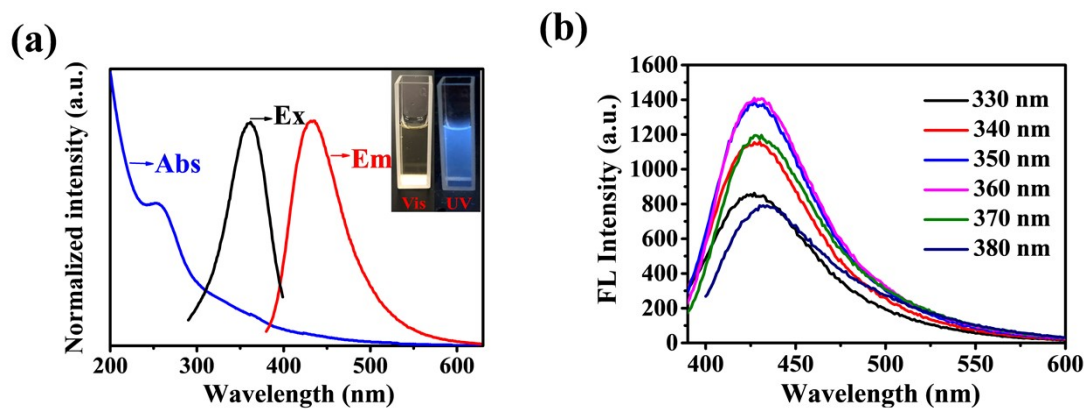

Fig. S4 (a) UV-vis absorption spectrum, excitation FL spectrum (360 nm) and emission FL spectrum (430 nm) of N,S-CDs. (b) FL spectra of N,S-CDs at different excitation wavelengths.

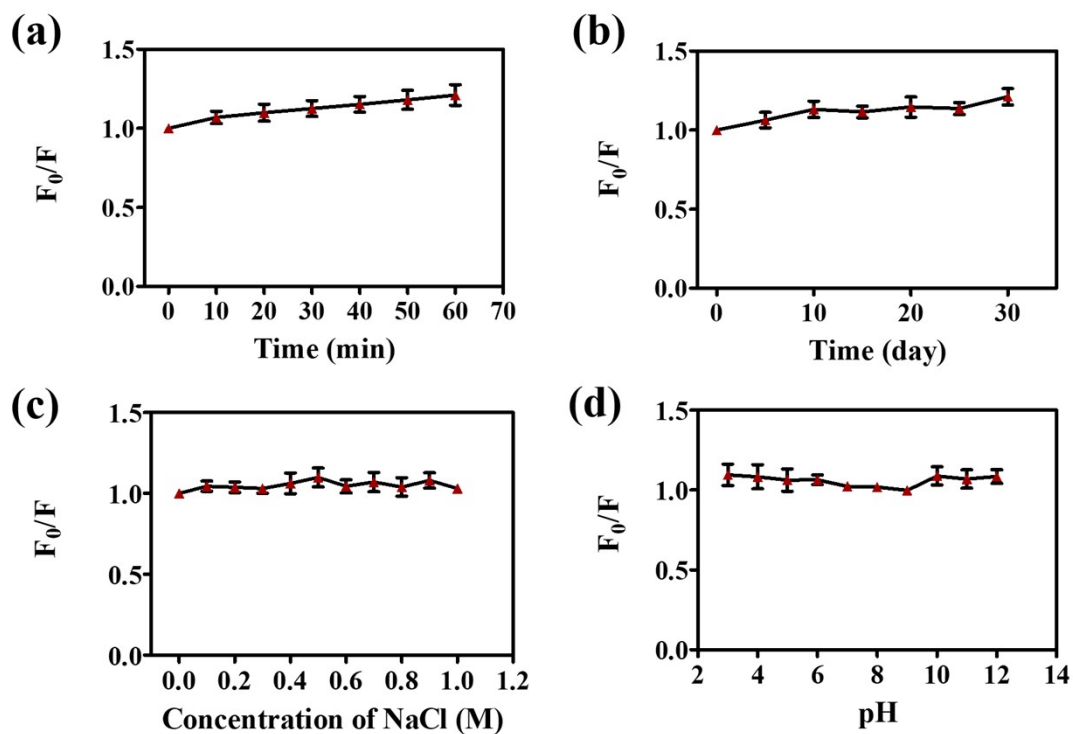

**Fig. S5** (a) The photobleaching characteristic of N,S-CDs. (b) Effect of storage time (days) on the FL of N,S-CDs. (c) Effect of the ion strength on FL of N,S-CDs. (d) Effect of the pH on FL of N,S-CDs.

**Table S1** Comparison of different reported methods for Cr(VI) detection

| Methods                  | Response time | Solvent                           | detection system          | LOD ( $\mu\text{M}$ ) | Linear range ( $\mu\text{M}$ )   | Reference |
|--------------------------|---------------|-----------------------------------|---------------------------|-----------------------|----------------------------------|-----------|
| CDs fluorescence probe   | 20 min        | PBS solution (pH 5.0)             | Fluorescence spectra      | 2.10                  | 2-180                            | 1         |
| Pb(II)-organic framework | -             | H <sub>2</sub> O                  | Luminescence spectra      | 13.2                  | 0-1000                           | 2         |
| Metal organic frameworks | 5             | deionized water                   | Photoluminescence Spectra | 41                    | 0-500                            | 3         |
| PVC-membrane electrode   | <30 s         | citric acid/sodium citrate buffer | Ion-selective electrode   | 2.5                   | 5.2-1.0 $\times$ 10 <sup>5</sup> | 4         |
| MR-CDs                   | 10 min        | HCl-KCl solution (pH 2.5)         | Fluorescence spectra      | 0.02                  | 0.2-50                           | 5         |
| N,S-CDs                  | 5 min         | deionized water                   | Fluorescence spectra      | 1.04                  | 0-120                            | This work |

**Table S2** Comparison of different reported methods for Cr(VI) and AA detection

| Methods              | Origins                                                               | Linear range of Cr(VI) ( $\mu\text{M}$ ) | LOD of Cr(VI) ( $\mu\text{M}$ ) | Linear range of AA ( $\mu\text{M}$ ) | LOD of AA ( $\mu\text{M}$ ) | Reference |
|----------------------|-----------------------------------------------------------------------|------------------------------------------|---------------------------------|--------------------------------------|-----------------------------|-----------|
| N,S-CDs              | ammonium citrate and cysteamine hydrochloride                         | 0.35-126.0                               | 0.11                            | 0.57-264.0                           | 0.17                        | 6         |
| N-CDs                | citric acid and glutamic acid                                         | 0.01–250                                 | 5 nM                            | 1-750                                | 0.3                         | 7         |
| N-CDs                | glucosamine and ethylenediamine                                       | 0.5–125                                  | 0.08                            | 0.25-175                             | 0.15                        | 8         |
| PNCQDs               | glucose, 1,2-ethylenediamine and concentrated $\text{H}_3\text{PO}_4$ | 1.5-30                                   | 23 nM                           | 5.0-200                              | 1.35                        | 9         |
| S <sub>3</sub> N-CDs | glucose, 1,2-ethylenediamine and concentrated $\text{H}_2\text{SO}_4$ | 0.065-198                                | 0.56 nM                         | 6.6-892                              | 76 nM                       | 10        |
| N,S-CDs              | seaweed ( <i>Sargassum carpophyllum</i> )                             | 0-120                                    | 1.04                            | 320-650                              | 2.99                        | This work |

## References

1. C. Li, W. Liu, X. Sun, W. Pan, J. J. S. Wang and A. B. Chemical, *Sensor Actuat B-Chem*, 2017, **252**, 544-553.
2. F. Guo, Z. Chu, M. Zhao, B. Zhu and X. J. J. o. S. S. C. Zhang, *J Solid State Chem*, 2019, **274**, 92-99.
3. X. Dao, Y. Ni, H. J. S. Pan and A. B. Chemical, *Sensor Actuat B-Chem*, 2018, **271**, 33-43.
4. A. Yari and H. Bagheri, *Journal of the Chinese Chemical Society*, 2009, **56**, 289-295.
5. Z. Ma, Y. Ma, M. Gu, X. Huo, S. Ma, Y. Lu, Y. Ning, X. Zhang, B. Tian and Z. Feng, *Nanomaterials (Basel)*, 2020, **10**.
6. H. Yang, L. He, Y. Long, H. Li, S. Pan, H. Liu, X. J. S. A. P. A. M. Hu and B. Spectroscopy, *Spectrochim Acta A*, 2018, **205**, 12-20.
7. Zhang, Yuhua, Fang, Xian, Zhao, Hong, Li, Z. J. T. t. I. J. o. Pure and A. A. Chemistry, 2018.

8. S. K. Tammina, Y. J. J. o. P. Yang and P. A. Chemistry, *J Photoch Photobio A*, 2020, **387**, 112134.
9. X. Gong, Y. Liu, Z. Yang, S. Shuang, Z. Zhang and C. J. A. c. a. Dong, *Anal Chim Acta*, 2017, **968**, 85-96.
10. S. Song, F. Liang, M. Li, F. Du, C. J. S. A. P. A. M. Dong and B. Spectroscopy, 2019, **215**, 58-68.
